# Supplementary material
Source: MDPI journal article supplement (https://www.mdpi.com/2073-4344/10/3/292)
Supplement: s1 [file s1]

# Supplementary materials

## Mechanism and Chemoselectivity of Mn-catalyzed Intramolecular Nitrene Transfer Reaction: C-H Amination vs. C=C Aziridination

Juping Wang<sup>1\*</sup>, Kangcheng Zheng<sup>2</sup>, Ting Li<sup>1</sup>, Xiaojing Zhan<sup>1</sup>

1. Department of Pharmaceutical Engineering, School of Pharmacy, Guangdong Pharmaceutical University, Guangzhou 510006, China

2. School of Chemistry, Sun Yat-sen University, Guangzhou 510275, China

\* Correspondence: jupingwang@gdpu.edu.cn; Tel.: +86-20-3935-2119;

Optimized structures of the species in the reaction pathways of allylic C-H amination and C=C aziridination.

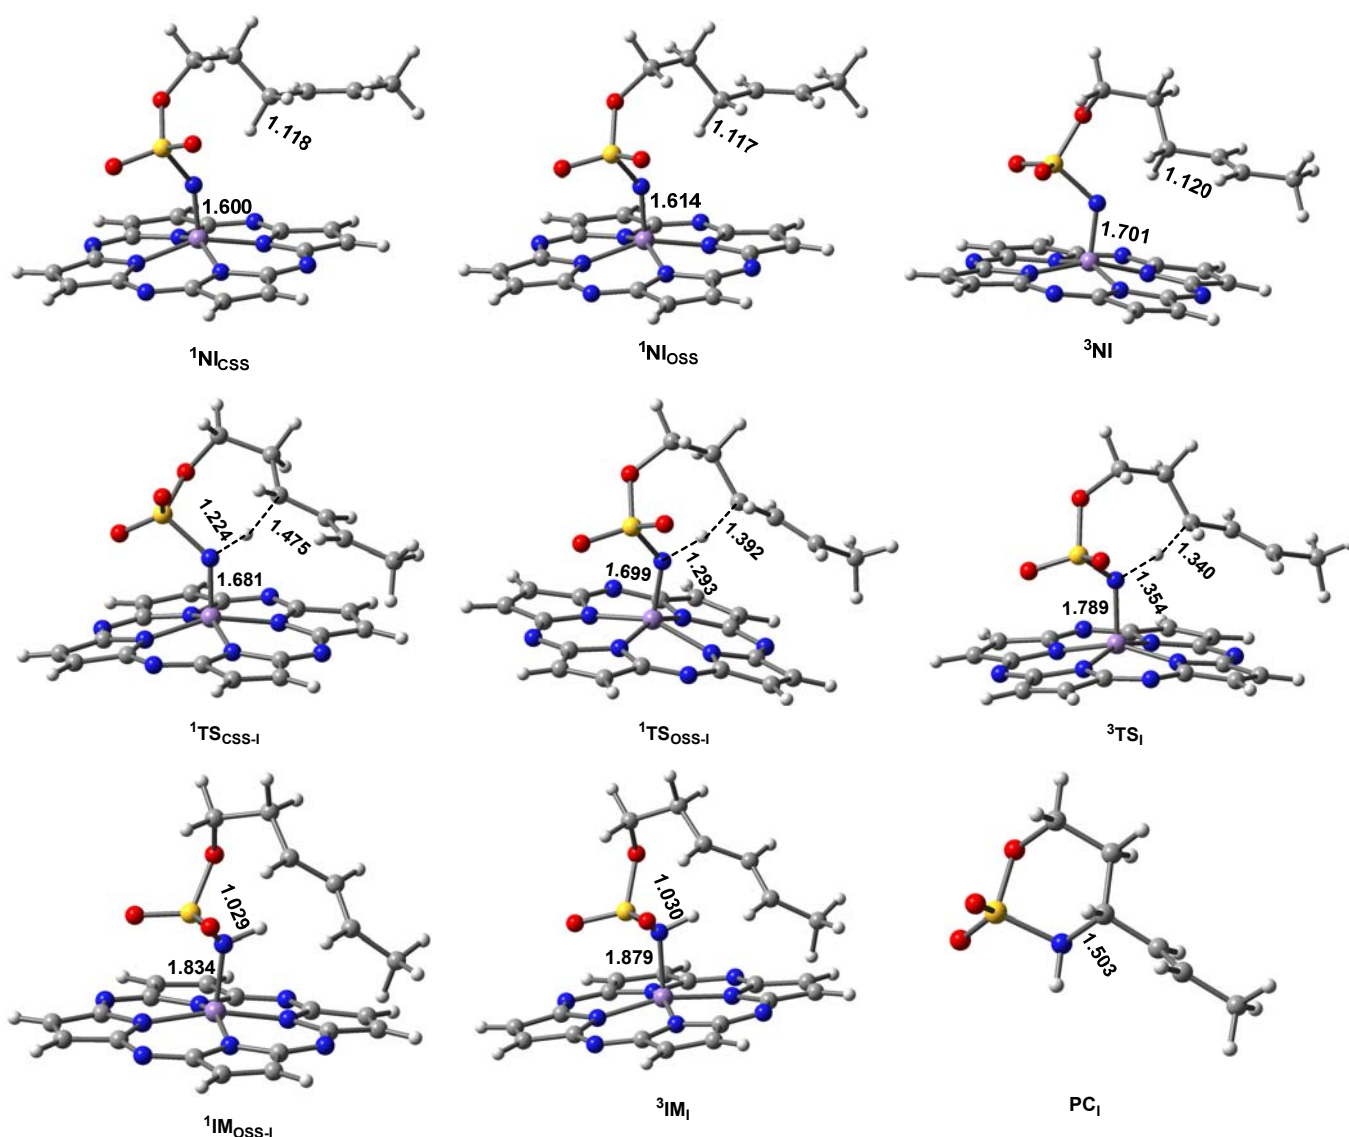

Figure S1(a). Optimized structures with important geometrical parameters (bond lengths in Å) of the species in the reaction pathways of allylic C-H amination.

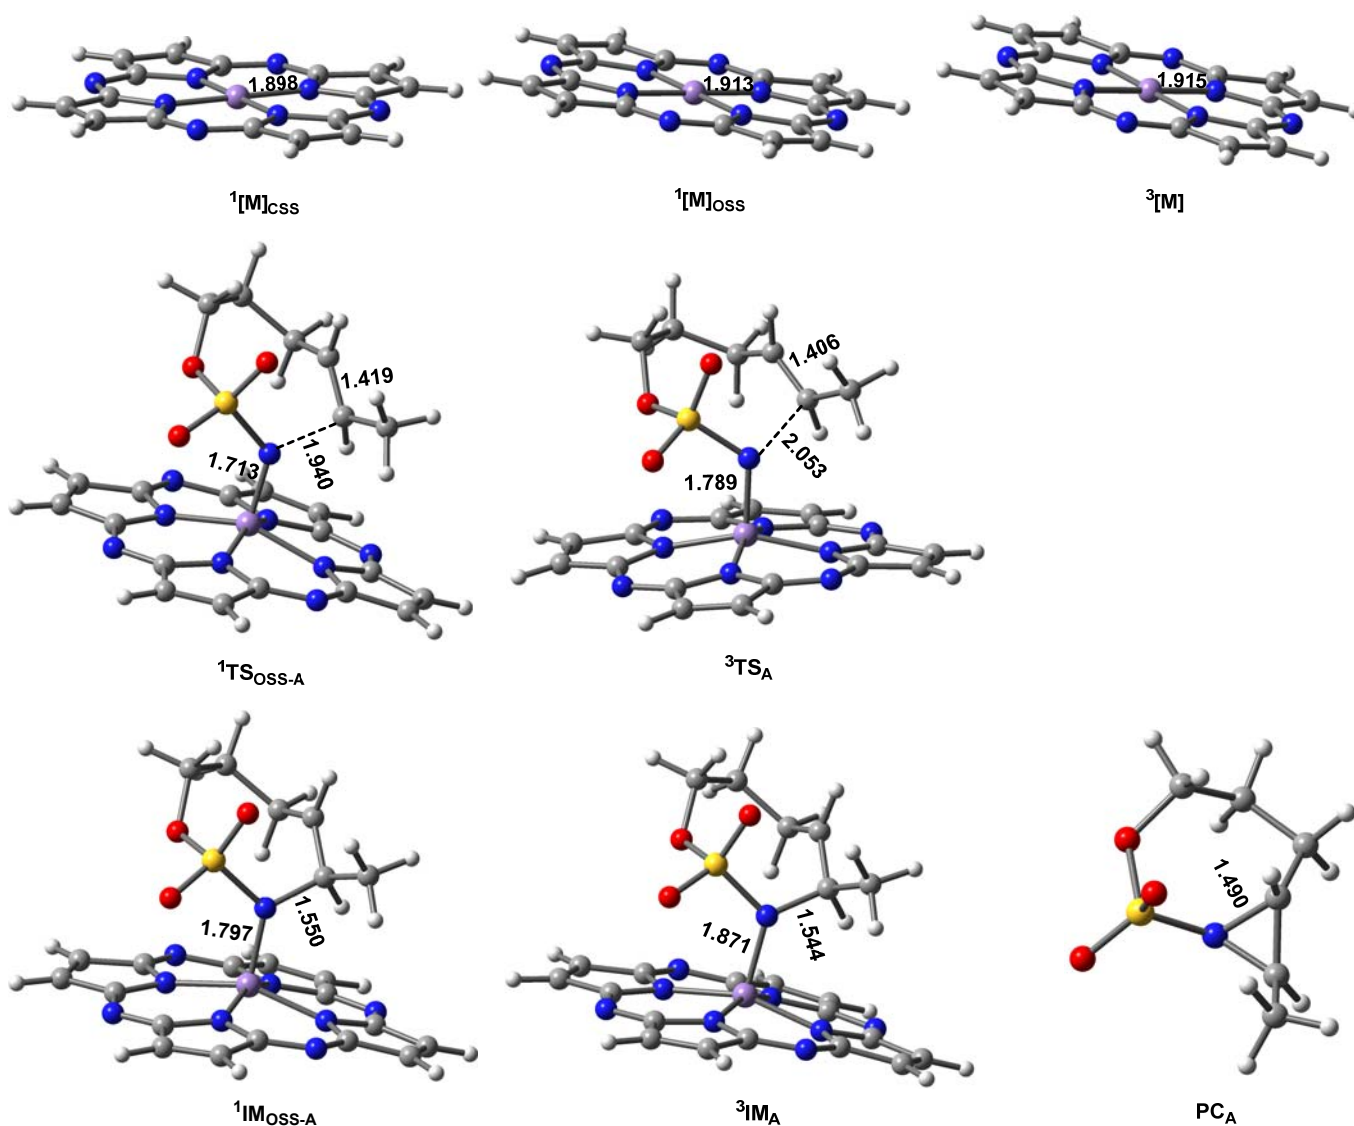

Figure S1(b). Optimized structures with important geometrical parameters (bond lengths in Å) of the species in the reaction pathways of allylic C=C aziridination.
